# Supplementary material for: A Review and Meta-analysis of Semantic Segmentation Models in Land Use/ Land Cover Mapping
Source: Preprints.org preprint supplement (doi:10.20944/preprints202405.0580.v1), 2024-05-09
Supplement: Supplementary file 1 [file supplementary]

Archive with 11 entries (11 files):
- Supplementary Files/A Review and Meta-analysis of Semantic Segmentation Models in Land Use Land Cover Mapping_Manuscript.pdf
- Supplementary Files/Extracted Records.pdf
- Supplementary Files/Figure 1.jpg
- Supplementary Files/Figure 2.png
- Supplementary Files/Figure 3.png
- Supplementary Files/Figure 4.png
- Supplementary Files/Figure 5.png
- Supplementary Files/Figure 6.jpg
- Supplementary Files/Figure 7.png
- Supplementary Files/Figure 8.png
- Supplementary Files/Figure 9.png
