# Supplementary material for: A Review and Meta-analysis of Semantic Segmentation Models in Land Use/ Land Cover Mapping
Source: Preprints.org preprint supplement (doi:10.20944/preprints202405.0580.v1), 2024-05-09
Supplement: Supplementary file 1 [file supplementary › Supplementary Files/Extracted Records.pdf]

- Akcay, O., Kinaci, A. C., Avsar, E. O., & Aydar, U. (2022). Semantic Segmentation of High-Resolution Airborne Images with Dual-Stream DeepLabV3+. *ISPRS International Journal of Geo-Information*, 11(1). <https://doi.org/10.3390/ijgi11010023>
- Audebert, N., Le Saux, B., & Lefèvre, S. (2017). Segment-before-detect: Vehicle detection and classification through semantic segmentation of aerial images. *Remote Sensing*, 9(4). <https://doi.org/10.3390/rs9040368>
- Ayhan, B., & Kwan, C. (2020). Tree, shrub, and grass classification using only RGB images. *Remote Sensing*, 12(8). <https://doi.org/10.3390/RS12081333>
- Bai, J., Wen, Z., Xiao, Z., Ye, F., Zhu, Y., Alazab, M., & Jiao, L. (2022). Hyperspectral Image Classification Based on Multibranch Attention Transformer Networks. *IEEE Transactions on Geoscience and Remote Sensing*, 60. <https://doi.org/10.1109/TGRS.2022.3196661>
- Barthakur, M., Sarma, K. K., & Mastorakis, N. (2020). Modified Semi-Supervised Adversarial Deep Network and Classifier Combination for Segmentation of Satellite Images. *IEEE Access*, 8, 117972–117985. <https://doi.org/10.1109/ACCESS.2020.3005085>
- Bem, P. P. D., de Carvalho Júnior, O. A., Carvalho, O. L. F. D., Gomes, R. A. T., Guimarães, R. F., & Pimentel, C. M. M. (2021). Irrigated rice crop identification in Southern Brazil using convolutional neural networks and Sentinel-1 time series. *Remote Sensing Applications: Society and Environment*, 24. <https://doi.org/10.1016/j.rsase.2021.100627>
- Bergado, J. R., Persello, C., & Stein, A. (2018). Recurrent Multiresolution Convolutional Networks for VHR Image Classification. *IEEE Transactions on Geoscience and Remote Sensing*, 56(11), 6361–6374. <https://doi.org/10.1109/TGRS.2018.2837357>
- Bergamasco, L., Bovolo, F., & Bruzzone, L. (2023). A Dual-Branch Deep Learning Architecture for Multisensor and Multitemporal Remote Sensing Semantic Segmentation. *IEEE Journal of Selected Topics in Applied Earth Observations and Remote Sensing*, 16, 2147–2162. <https://doi.org/10.1109/JSTARS.2023.3243396>
- Billson, J., Islam, M. D. S., Sun, X., & Cheng, I. (2023). Water Body Extraction from Sentinel-2 Imagery with Deep Convolutional Networks and Pixelwise Category Transplantation. *Remote Sensing*, 15(5). <https://doi.org/10.3390/rs15051253>
- Boonpook, W., Tan, Y., Nardkulpat, A., Torsri, K., Torteeka, P., Kamsing, P., Sawangwit, U., Pena, J., & Jainaen, M. (2023). Deep Learning Semantic Segmentation for Land Use and Land Cover Types Using Landsat 8 Imagery. *ISPRS International Journal of Geo-Information*, 12(1). <https://doi.org/10.3390/ijgi12010014>
- Buchsteiner, C., Baur, P. A., & Glatzel, S. (2023). Spatial Analysis of Intra-Annual Reed Ecosystem Dynamics at Lake Neusiedl Using RGB Drone Imagery and Deep Learning. *Remote Sensing*, 15(16). <https://doi.org/10.3390/rs15163961>
- Cecili, G., De Fioravante, P., Congedo, L., Marchetti, M., & Munafò, M. (2022). Land Consumption Mapping with Convolutional Neural Network: Case Study in Italy. *Land*, 11(11). <https://doi.org/10.3390/land11111919>
- Chen, H., Cheng, L., Li, N., Yao, Y., Cheng, J., & Zhang, K. (2023). S&GDA: An Unsupervised Domain Adaptive Semantic Segmentation Framework Considering Both Imaging Scene and Geometric Domain Shifts. *IEEE Transactions on Geoscience and Remote Sensing*, 61. <https://doi.org/10.1109/TGRS.2023.3288289>

- Chen, T.-H. K., Qiu, C., Schmitt, M., Zhu, X. X., Sabel, C. E., & Prishchepov, A. V. (2020). Mapping horizontal and vertical urban densification in Denmark with Landsat time-series from 1985 to 2018: A semantic segmentation solution. *Remote Sensing of Environment*, 251. <https://doi.org/10.1016/j.rse.2020.112096>
- Cho, A. Y., Park, S.-E., Kim, D.-J., Kim, J., Li, C., & Song, J. (2023). Burned Area Mapping Using Unitemporal PlanetScope Imagery With a Deep Learning Based Approach. *IEEE Journal of Selected Topics in Applied Earth Observations and Remote Sensing*, 16, 242–253. <https://doi.org/10.1109/JSTARS.2022.3225070>
- Clark, A., Phinn, S., & Scarth, P. (2023). Pre-Processing Training Data Improves Accuracy and Generalisability of Convolutional Neural Network Based Landscape Semantic Segmentation. *Land*, 12(7). <https://doi.org/10.3390/land12071268>
- Di Pilato, A., Taggio, N., Pompili, A., Iacobellis, M., Di Florio, A., Passarelli, D., & Samarelli, S. (2021). Deep learning approaches to earth observation change detection. *Remote Sensing*, 13(20). <https://doi.org/10.3390/rs13204083>
- Dimitrovski, I., Kitanovski, I., Panov, P., Kostovska, A., Simidjievski, N., & Kocev, D. (2023). AiTLAS: Artificial Intelligence Toolbox for Earth Observation. *Remote Sensing*, 15(9). <https://doi.org/10.3390/rs15092343>
- Dong, X., Zhang, C., Fang, L., & Yan, Y. (2022). A deep learning based framework for remote sensing image ground object segmentation. *Applied Soft Computing*, 130. <https://doi.org/10.1016/j.asoc.2022.109695>
- Fan, Z., Zhan, T., Gao, Z., Li, R., Liu, Y., Zhang, L., Jin, Z., & Xu, S. (2022). Land Cover Classification of Resources Survey Remote Sensing Images Based on Segmentation Model. *IEEE Access*, 10, 56267–56281. <https://doi.org/10.1109/ACCESS.2022.3175978>
- Fang, B., Chen, G., Chen, J., Ouyang, G., Kou, R., & Wang, L. (2021). Cct: Conditional co-training for truly unsupervised remote sensing image segmentation in coastal areas. *Remote Sensing*, 13(17). <https://doi.org/10.3390/rs13173521>
- Garg, R., Kumar, A., Bansal, N., Prateek, M., & Kumar, S. (2021). Semantic segmentation of PolSAR image data using advanced deep learning model. *Scientific Reports*, 11(1). <https://doi.org/10.1038/s41598-021-94422-y>
- Gomez-Ossa, L. F., Sanchez-Torres, G., & Branch-Bedoya, J. W. (2023). Land Cover Classification in the Antioquia Region of the Tropical Andes Using NICFI Satellite Data Program Imagery and Semantic Segmentation Techniques. *Data*, 8(12). <https://doi.org/10.3390/data8120185>
- Gong, M., Zhan, T., Zhang, P., & Miao, Q. (2017). Superpixel-based difference representation learning for change detection in multispectral remote sensing images. *IEEE Transactions on Geoscience and Remote Sensing*, 55(5), 2658–2673. <https://doi.org/10.1109/TGRS.2017.2650198>
- He, J., Lyu, D., He, L., Zhang, Y., Xu, X., Yi, H., Tian, Q., Liu, B., & Zhang, X. (2023). Combining Object-Oriented and Deep Learning Methods to Estimate Photosynthetic and Non-Photosynthetic Vegetation Cover in the Desert from Unmanned Aerial Vehicle Images with Consideration of Shadows. *Remote Sensing*, 15(1). <https://doi.org/10.3390/rs15010105>
- Ji, S., Wang, D., & Luo, M. (2021). Generative Adversarial Network-Based Full-Space Domain Adaptation for Land Cover Classification from Multiple-Source Remote Sensing Images. *IEEE Transactions on Geoscience and Remote Sensing*, 59(5), 3816–3828. <https://doi.org/10.1109/TGRS.2020.3020804>

- Ji, W., Chen, Y., Li, K., & Dai, X. (2023). Multicascaded Feature Fusion-Based Deep Learning Network for Local Climate Zone Classification Based on the So2Sat LCZ42 Benchmark Dataset. *IEEE Journal of Selected Topics in Applied Earth Observations and Remote Sensing*, 16, 449–467. <https://doi.org/10.1109/JSTARS.2022.3226524>
- Jia, J., Song, J., Kong, Q., Yang, H., Teng, Y., & Song, X. (2023). Multi-Attention-Based Semantic Segmentation Network for Land Cover Remote Sensing Images. *Electronics (Switzerland)*, 12(6). <https://doi.org/10.3390/electronics12061347>
- Jiang, L., Li, F., Huang, L., Peng, F., & Hu, L. (2023). TNet: A Temporal-Transform Network for Semantic Change Detection Based on Bi-Temporal Remote Sensing Images. *Remote Sensing*, 15(18). <https://doi.org/10.3390/rs15184555>
- Kang, J., Fernandez-Beltran, R., Sun, X., Ni, J., & Plaza, A. (2022). Deep Learning-Based Building Footprint Extraction with Missing Annotations. *IEEE Geoscience and Remote Sensing Letters*, 19. <https://doi.org/10.1109/LGRS.2021.3072589>
- Karila, K., Matikainen, L., Karjalainen, M., Puttonen, E., Chen, Y., & Hyypä, J. (2023). Automatic labelling for semantic segmentation of VHR satellite images: Application of airborne laser scanner data and object-based image analysis. *ISPRS Open Journal of Photogrammetry and Remote Sensing*, 9. <https://doi.org/10.1016/j.ophoto.2023.100046>
- Khan, S. D., Alarabi, L., & Basalamah, S. (2021). Deep hybrid network for land cover semantic segmentation in high-spatial resolution satellite images. *Information (Switzerland)*, 12(6). <https://doi.org/10.3390/info12060230>
- Kotru, R., Turkar, V., Simu, S., De, S., Shaikh, M., Banerjee, S., Singh, G., & Das, A. (2022). Development of a generalized model to classify various land covers for ALOS-2 L-Band images using semantic segmentation. *Advances in Space Research*, 70(12), 3811–3821. <https://doi.org/10.1016/j.asr.2022.07.078>
- Kwak, T., & Kim, Y. (2023). Semi-Supervised Land Cover Classification of Remote Sensing Imagery Using CycleGAN and EfficientNet. *KSCE Journal of Civil Engineering*, 27(4), 1760–1773. <https://doi.org/10.1007/s12205-023-2285-0>
- Lee, S.-H., Han, K.-J., Lee, K., Lee, K.-J., Oh, K.-Y., & Lee, M.-J. (2020). Classification of landscape affected by deforestation using high-resolution remote sensing data and deep-learning techniques. *Remote Sensing*, 12(20), 1–16. <https://doi.org/10.3390/rs12203372>
- Li, J., Wang, H., Zhang, A., & Liu, Y. (2022). Semantic Segmentation of Hyperspectral Remote Sensing Images Based on PSE-UNet Model. *Sensors*, 22(24). <https://doi.org/10.3390/s22249678>
- Li, W., Chen, K., Chen, H., & Shi, Z. (2022). Geographical Knowledge-Driven Representation Learning for Remote Sensing Images. *IEEE Transactions on Geoscience and Remote Sensing*, 60. <https://doi.org/10.1109/TGRS.2021.3115569>
- Li, Y., Zhou, Y., Zhang, Y., Zhong, L., Wang, J., & Chen, J. (2022). DKDFN: Domain Knowledge-Guided deep collaborative fusion network for multimodal unitemporal remote sensing land cover classification. *ISPRS Journal of Photogrammetry and Remote Sensing*, 186, 170–189. <https://doi.org/10.1016/j.isprsjprs.2022.02.013>
- Liu, C.-C., Zhang, Y.-C., Chen, P.-Y., Lai, C.-C., Chen, Y.-H., Cheng, J.-H., & Ko, M.-H. (2019). Clouds classification from Sentinel-2 imagery with deep residual learning and semantic image segmentation. *Remote Sensing*, 11(2). <https://doi.org/10.3390/rs11020119>

- Liu, M., Zhang, P., Shi, Q., & Liu, M. (2022). An Adversarial Domain Adaptation Framework with KL-Constraint for Remote Sensing Land Cover Classification. *IEEE Geoscience and Remote Sensing Letters*, 19. <https://doi.org/10.1109/LGRS.2021.3066004>
- Liu, Q., Kampffmeyer, M., Jenssen, R., & Salberg, A.-B. (2020). Dense dilated convolutions merging network for land cover classification. *IEEE Transactions on Geoscience and Remote Sensing*, 58(9), 6309–6320. <https://doi.org/10.1109/TGRS.2020.2976658>
- Liu, R., Tao, F., Liu, X., Na, J., Leng, H., Wu, J., & Zhou, T. (2022). RANet: A Residual ASPP with Attention Framework for Semantic Segmentation of High-Resolution Remote Sensing Images. *Remote Sensing*, 14(13). <https://doi.org/10.3390/rs14133109>
- Liu, S., Peng, D., Zhang, B., Chen, Z., Yu, L., Chen, J., Pan, Y., Zheng, S., Hu, J., Lou, Z., Chen, Y., & Yang, S. (2022). The Accuracy of Winter Wheat Identification at Different Growth Stages Using Remote Sensing. *Remote Sensing*, 14(4). <https://doi.org/10.3390/rs14040893>
- Lu, T., Wan, L., Qi, S., & Gao, M. (2023). Land Cover Classification of UAV Remote Sensing Based on Transformer–CNN Hybrid Architecture. *Sensors*, 23(11). <https://doi.org/10.3390/s23115288>
- Ma, Z., Xia, M., Lin, H., Qian, M., & Zhang, Y. (2023). FENet: feature enhancement network for land cover classification. *International Journal of Remote Sensing*, 44(5), 1702–1725. <https://doi.org/10.1080/01431161.2023.2190471>
- Martins, V. S., Kaleita, A. L., Gelder, B. K., da Silveira, H. L. F., & Abe, C. A. (2020). Exploring multiscale object-based convolutional neural network (multi-OCNN) for remote sensing image classification at high spatial resolution. *ISPRS Journal of Photogrammetry and Remote Sensing*, 168, 56–73. <https://doi.org/10.1016/j.isprsjprs.2020.08.004>
- Maxwell, A. E., Bester, M. S., Guillen, L. A., Ramezan, C. A., Carpinello, D. J., Fan, Y., Hartley, F. M., Maynard, S. M., & Pyron, J. L. (2020). Semantic segmentation deep learning for extracting surface mine extents from historic topographic maps. *Remote Sensing*, 12(24), 1–25. <https://doi.org/10.3390/rs12244145>
- Mehra, A., Jain, N., & Srivastava, H. S. (2022). A novel approach to use semantic segmentation based deep learning networks to classify multi-temporal SAR data. *Geocarto International*, 37(1), 163–178. <https://doi.org/10.1080/10106049.2019.1704072>
- Miao, G., Wang, H., & Zhang, E. (2023). MAFNet: A Multiangle Attention Fusion Network for Land Cover Classification. *IEEE Journal of Selected Topics in Applied Earth Observations and Remote Sensing*, 16, 8655–8670. <https://doi.org/10.1109/JSTARS.2023.3314847>
- Mohammadimanesh, F., Salehi, B., Mahdianpari, M., Gill, E., & Molinier, M. (2019). A new fully convolutional neural network for semantic segmentation of polarimetric SAR imagery in complex land cover ecosystem. *ISPRS Journal of Photogrammetry and Remote Sensing*, 151, 223–236. <https://doi.org/10.1016/j.isprsjprs.2019.03.015>
- Morais, T. G., Domingos, T., & Teixeira, R. F. M. (2023). Semantic Segmentation of Portuguese Agri-Forestry Using High-Resolution Orthophotos. *Agronomy*, 13(11). <https://doi.org/10.3390/agronomy13112741>
- Niu, B., Feng, Q., Su, S., Yang, Z., Zhang, S., Liu, S., Wang, J., Yang, J., & Gong, J. (2023). Semantic segmentation for plastic-covered greenhouses and plastic-mulched farmlands from VHR imagery. *International Journal of Digital Earth*, 16(2), 4553–4572. <https://doi.org/10.1080/17538947.2023.2275657>

- Pashaei, M., Kamangir, H., Starek, M. J., & Tissot, P. (2020). Review and evaluation of deep learning architectures for efficient land cover mapping with UAS hyper-spatial imagery: A case study over a wetland. *Remote Sensing*, 12(6). <https://doi.org/10.3390/rs12060959>
- Safarov, F., Temurbek, K., Jamoljon, D., Temur, O., Chedjou, J. C., Abdusalomov, A. B., & Cho, Y.-I. (2022). Improved Agricultural Field Segmentation in Satellite Imagery Using TL-ResUNet Architecture. *Sensors*, 22(24). <https://doi.org/10.3390/s22249784>
- Sang, Q., Zhuang, Y., Dong, S., Wang, G., & Chen, H. (2020). FRF-Net: Land Cover Classification from Large-Scale VHR Optical Remote Sensing Images. *IEEE Geoscience and Remote Sensing Letters*, 17(6), 1057–1061. <https://doi.org/10.1109/LGRS.2019.2938555>
- Saralioglu, E., & Gungor, O. (2022). Semantic segmentation of land cover from high resolution multispectral satellite images by spectral-spatial convolutional neural network. *Geocarto International*, 37(2), 657–677. <https://doi.org/10.1080/10106049.2020.1734871>
- Scepanovic, S., Antropov, O., Laurila, P., Rauste, Y., Ignatenko, V., & Praks, J. (2021). Wide-Area Land Cover Mapping with Sentinel-1 Imagery Using Deep Learning Semantic Segmentation Models. *IEEE Journal of Selected Topics in Applied Earth Observations and Remote Sensing*, 14, 10357–10374. <https://doi.org/10.1109/JSTARS.2021.3116094>
- Shen, X., Weng, L., Xia, M., & Lin, H. (2022). Multi-Scale Feature Aggregation Network for Semantic Segmentation of Land Cover. *Remote Sensing*, 14(23). <https://doi.org/10.3390/rs14236156>
- Shi, H., Fan, J., Wang, Y., & Chen, L. (2021). Dual attention feature fusion and adaptive context for accurate segmentation of very high-resolution remote sensing images. *Remote Sensing*, 13(18). <https://doi.org/10.3390/rs13183715>
- Shi, W., Qin, W., & Chen, A. (2022). Towards Robust Semantic Segmentation of Land Covers in Foggy Conditions. *Remote Sensing*, 14(18). <https://doi.org/10.3390/rs14184551>
- Shi, W., Qin, W., Yun, Z., Chen, A., Huang, K., & Zhao, T. (2022). Land Cover Classification in Foggy Conditions: Toward Robust Models. *IEEE Geoscience and Remote Sensing Letters*, 19. <https://doi.org/10.1109/LGRS.2022.3187779>
- Shi, W., Qin, W., Yun, Z., Wu, C., Yang, Y., & Zhao, T. (2023). Semantic Representation Fusion-Based Network for Robust Land Cover Classification in Foggy Conditions. *IEEE Transactions on Geoscience and Remote Sensing*, 61. <https://doi.org/10.1109/TGRS.2023.3280158>
- Shi, X., Fu, S., Chen, J., Wang, F., & Xu, F. (2021). Object-Level Semantic Segmentation on the High-Resolution Gaofen-3 FUSAR-Map Dataset. *IEEE Journal of Selected Topics in Applied Earth Observations and Remote Sensing*, 14, 3107–3119. <https://doi.org/10.1109/JSTARS.2021.3063797>
- Sirous, A., Satari, M., Shahraki, M. M., & Pashayi, M. (2023). A Conditional Generative Adversarial Network for urban area classification using multi-source data. *Earth Science Informatics*, 16(3), 2529–2543. <https://doi.org/10.1007/s12145-023-01050-3>
- Sravva, N., Priyanka, Lal, S., Nalini, J., Reddy, C. S., & Dell'acqua, F. (2023). DPPNet: An Efficient and Robust Deep Learning Network for Land Cover Segmentation From High-Resolution Satellite Images. *IEEE Transactions on Emerging Topics in Computational Intelligence*, 7(1), 128–139. <https://doi.org/10.1109/TETCI.2022.3182414>
- Sun, Z., Zhou, W., Ding, C., & Xia, M. (2022). Multi-Resolution Transformer Network for Building and Road Segmentation of Remote Sensing Image. *ISPRS International Journal of Geo-Information*, 11(3). <https://doi.org/10.3390/ijgi11030165>

- Sykas, D., Sdraka, M., Zografakis, D., & Papoutsis, I. (2022). A Sentinel-2 Multiyear, Multicountry Benchmark Dataset for Crop Classification and Segmentation With Deep Learning. *IEEE Journal of Selected Topics in Applied Earth Observations and Remote Sensing*, 15, 3323–3339. <https://doi.org/10.1109/JSTARS.2022.3164771>
- Tian, T., Chu, Z., Hu, Q., & Ma, L. (2021). Class-wise fully convolutional network for semantic segmentation of remote sensing images. *Remote Sensing*, 13(16). <https://doi.org/10.3390/rs13163211>
- Tzepkenlis, A., Marthoglou, K., & Grammalidis, N. (2023). Efficient Deep Semantic Segmentation for Land Cover Classification Using Sentinel Imagery. *Remote Sensing*, 15(8). <https://doi.org/10.3390/rs15082027>
- Van den Broeck, W. A. J., Goedemé, T., & Loopmans, M. (2022). Multiclass Land Cover Mapping from Historical Orthophotos Using Domain Adaptation and Spatio-Temporal Transfer Learning. *Remote Sensing*, 14(23). <https://doi.org/10.3390/rs14235911>
- Vasavi, S., Sri Somagani, H., & Sai, Y. (2023). Classification of buildings from VHR satellite images using ensemble of U-Net and ResNet. *Egyptian Journal of Remote Sensing and Space Science*, 26(4), 937–953. <https://doi.org/10.1016/j.ejrs.2023.11.008>
- Volpi, M., & Tuia, D. (2017). Dense semantic labeling of subdecimeter resolution images with convolutional neural networks. *IEEE Transactions on Geoscience and Remote Sensing*, 55(2), 881–893. <https://doi.org/10.1109/TGRS.2016.2616585>
- Wan, L., Li, S., Chen, Y., He, Z., & Shi, Y. (2022). Application of Deep Learning in Land Use Classification for Soil Erosion Using Remote Sensing. *Frontiers in Earth Science*, 10. <https://doi.org/10.3389/feart.2022.849531>
- Wang, D., Yang, R., Liu, H., He, H., Tan, J., Li, S., Qiao, Y., Tang, K., & Wang, X. (2022). HFENet: Hierarchical Feature Extraction Network for Accurate Landcover Classification. *Remote Sensing*, 14(17). <https://doi.org/10.3390/rs14174244>
- Wang, D., Yang, R., Zhang, Z., Liu, H., Tan, J., Li, S., Yang, X., Wang, X., Tang, K., Qiao, Y., Qiao, Y., & Su, P. (2023). P-Swin: Parallel Swin transformer multi-scale semantic segmentation network for land cover classification. *Computers and Geosciences*, 175. <https://doi.org/10.1016/j.cageo.2023.105340>
- Wang, J., Ding, N., & He, G. (2023). A boundary enhancement loss function for semantic segmentation of land cover. *International Journal of Remote Sensing*, 44(12), 3637–3659. <https://doi.org/10.1080/01431161.2023.2224101>
- Wang, L., Li, R., Wang, D., Duan, C., Wang, T., & Meng, X. (2021). Transformer meets convolution: A bilateral awareness network for semantic segmentation of very fine resolution urban scene images. *Remote Sensing*, 13(16). <https://doi.org/10.3390/rs13163065>
- Wang, L., Li, R., Zhang, C., Fang, S., Duan, C., Meng, X., & Atkinson, P. M. (2022). UNetFormer: A UNet-like transformer for efficient semantic segmentation of remote sensing urban scene imagery. *ISPRS Journal of Photogrammetry and Remote Sensing*, 190, 196–214. <https://doi.org/10.1016/j.isprsjprs.2022.06.008>
- Wang, Y., Shi, H., Zhuang, Y., Sang, Q., & Chen, L. (2020). Bidirectional grid fusion network for accurate land cover classification of high-resolution remote sensing images. *IEEE Journal of Selected Topics in Applied Earth Observations and Remote Sensing*, 13, 5508–5517. <https://doi.org/10.1109/JSTARS.2020.3023645>

- Wang, Z., & Mahmoudian, N. (2023). Aerial Fluvial Image Dataset for Deep Semantic Segmentation Neural Networks and Its Benchmarks. *IEEE Journal of Selected Topics in Applied Earth Observations and Remote Sensing*, 16, 4755–4766. <https://doi.org/10.1109/JSTARS.2023.3275068>
- Wei, H., Xu, X., Ou, N., Zhang, X., & Dai, Y. (2021). Deanet: Dual encoder with attention network for semantic segmentation of remote sensing imagery. *Remote Sensing*, 13(19). <https://doi.org/10.3390/rs13193900>
- Wei, P., Chai, D., Huang, R., Peng, D., Lin, T., Sha, J., Sun, W., & Huang, J. (2022). Rice mapping based on Sentinel-1 images using the coupling of prior knowledge and deep semantic segmentation network: A case study in Northeast China from 2019 to 2021. *International Journal of Applied Earth Observation and Geoinformation*, 112. <https://doi.org/10.1016/j.jag.2022.102948>
- Weng, L., Pang, K., Xia, M., Lin, H., Qian, M., & Zhu, C. (2023). Sgformer: A Local and Global Features Coupling Network for Semantic Segmentation of Land Cover. *IEEE Journal of Selected Topics in Applied Earth Observations and Remote Sensing*, 16, 6812–6824. <https://doi.org/10.1109/JSTARS.2023.3295729>
- Wenger, R., Puissant, A., Weber, J., Idoumghar, L., & Forestier, G. (2023). Multimodal and Multitemporal Land Use/Land Cover Semantic Segmentation on Sentinel-1 and Sentinel-2 Imagery: An Application on a MultiSenGE Dataset. *Remote Sensing*, 15(1). <https://doi.org/10.3390/rs15010151>
- Wu, L., He, D., Ai, B., Wang, J., Guan, K., Zhong, Z., Liu, D., & Zhu, F. (2023). Canny Enhanced High-Resolution Neural Network for Satellite Image Based Land Cover Classification and Its Application in Wireless Channel Simulations. *IEEE Journal on Selected Topics in Signal Processing*, 17(1), 279–294. <https://doi.org/10.1109/JSTSP.2022.3222597>
- Xia, J., Yokoya, N., Adriano, B., Zhang, L., Li, G., & Wang, Z. (2021). A Benchmark High-Resolution GaoFen-3 SAR Dataset for Building Semantic Segmentation. *IEEE Journal of Selected Topics in Applied Earth Observations and Remote Sensing*, 14, 5950–5963. <https://doi.org/10.1109/JSTARS.2021.3085122>
- Xiao, D., Kang, Z., Fu, Y., Li, Z., & Ran, M. (2023). Cswin-unet: a Swin-unet network for semantic segmentation of remote sensing images by aggregating contextual information and extracting spatial information. *International Journal of Remote Sensing*, 44(23), 7598–7625. <https://doi.org/10.1080/01431161.2023.2285738>
- Xu, L., Liu, Y., Shi, S., Zhang, H., & Wang, D. (2023). Land-Cover Classification With High-Resolution Remote Sensing Images Using Interactive Segmentation. *IEEE Access*, 11, 6735–6747. <https://doi.org/10.1109/ACCESS.2022.3205327>
- Xu, L., Shi, S., Liu, Y., Zhang, H., Wang, D., Zhang, L., Liang, W., & Chen, H. (2023). A large-scale remote sensing scene dataset construction for semantic segmentation. *International Journal of Image and Data Fusion*, 14(4), 299–323. <https://doi.org/10.1080/19479832.2023.2199005>
- Xu, S., Zhang, S., Zeng, J., Li, T., Guo, Q., & Jin, S. (2020). A Framework for Land Use Scenes Classification Based on Landscape Photos. *IEEE Journal of Selected Topics in Applied Earth Observations and Remote Sensing*, 13, 6124–6141. <https://doi.org/10.1109/JSTARS.2020.3028158>
- Xu, Y., Wu, L., Xie, Z., & Chen, Z. (2018). Building extraction in very high resolution remote sensing imagery using deep learning and guided filters. *Remote Sensing*, 10(1). <https://doi.org/10.3390/rs10010144>
- Yang, X., Chen, Z., Zhang, B., Li, B., Bai, Y., & Chen, P. (2022). A Block Shuffle Network with Superpixel Optimization for Landsat Image Semantic Segmentation. *Remote Sensing*, 14(6). <https://doi.org/10.3390/rs14061432>

- Yang, X., Zhang, B., Chen, Z., Bai, Y., & Chen, P. (2022). A Multi-Temporal Network for Improving Semantic Segmentation of Large-Scale Landsat Imagery. *Remote Sensing*, 14(19). <https://doi.org/10.3390/rs14195062>
- Yu, D., & Ji, S. (2023). Long-Range Correlation Supervision for Land-Cover Classification From Remote Sensing Images. *IEEE Transactions on Geoscience and Remote Sensing*, 61. <https://doi.org/10.1109/TGRS.2023.3324706>
- Yu, J., Zeng, P., Yu, Y., Yu, H., Huang, L., & Zhou, D. (2022). A Combined Convolutional Neural Network for Urban Land-Use Classification with GIS Data. *Remote Sensing*, 14(5). <https://doi.org/10.3390/rs14051128>
- Yu, Y., Shen, Y., Liu, Y., Wei, Y., Rui, X., & Li, B. (2023). Knowledge mapping and trends in research on remote sensing change detection using CiteSpace analysis. *Earth Science Informatics*, 16(1), 787–801. <https://doi.org/10.1007/s12145-022-00914-4>
- Yuan, X., Chen, Z., Chen, N., & Gong, J. (2021). Land cover classification based on the PSPNet and superpixel segmentation methods with high spatial resolution multispectral remote sensing imagery. *Journal of Applied Remote Sensing*, 15(3). <https://doi.org/10.1117/1.JRS.15.034511>
- Zhang, B., Zhang, Y., Li, Y., Wan, Y., Guo, H., Zheng, Z., & Yang, K. (2023). Semi-supervised Deep Learning via Transformation Consistency Regularization for Remote Sensing Image Semantic Segmentation. *IEEE Journal of Selected Topics in Applied Earth Observations and Remote Sensing*, 16, 5782–5796. <https://doi.org/10.1109/JSTARS.2022.3203750>
- Zhang, C., Yue, P., Tapete, D., Shangguan, B., Wang, M., & Wu, Z. (2020). A multi-level context-guided classification method with object-based convolutional neural network for land cover classification using very high resolution remote sensing images. *International Journal of Applied Earth Observation and Geoinformation*, 88. <https://doi.org/10.1016/j.jag.2020.102086>
- Zhang, X., Du, L., Tan, S., Wu, F., Zhu, L., Zeng, Y., & Wu, B. (2021). Land use and land cover mapping using rapideye imagery based on a novel band attention deep learning method in the three Gorges reservoir area. *Remote Sensing*, 13(6). <https://doi.org/10.3390/rs13061225>
- Zhang, X., Wang, Z., Zhang, J., & Wei, A. (2022). MSANet: an improved semantic segmentation method using multi-scale attention for remote sensing images. *Remote Sensing Letters*, 13(12), 1249–1259. <https://doi.org/10.1080/2150704X.2022.2142075>
- Zhang, Z., Doi, K., Iwasaki, A., & Xu, G. (2021). Unsupervised Domain Adaptation of High-Resolution Aerial Images via Correlation Alignment and Self Training. *IEEE Geoscience and Remote Sensing Letters*, 18(4), 746–750. <https://doi.org/10.1109/LGRS.2020.2982783>
- Zhang, Z., Huang, X., & Li, J. (2023). DWin-HRFormer: A High-Resolution Transformer Model With Directional Windows for Semantic Segmentation of Urban Construction Land. *IEEE Transactions on Geoscience and Remote Sensing*, 61. <https://doi.org/10.1109/TGRS.2023.3241366>
- Zheng, X., Ma, Q., Huan, L., Xie, X., Xiong, H., & Gong, J. (2023). Semantic-Aware Region Loss for Land-Cover Classification. *IEEE Journal of Selected Topics in Applied Earth Observations and Remote Sensing*, 16, 4139–4152. <https://doi.org/10.1109/JSTARS.2023.3265365>
- Zhou, G., Xu, J., Chen, W., Li, X., Li, J., & Wang, L. (2023). Deep Feature Enhancement Method for Land Cover With Irregular and Sparse Spatial Distribution Features: A Case Study on Open-Pit Mining. *IEEE Transactions on Geoscience and Remote Sensing*, 61. <https://doi.org/10.1109/TGRS.2023.3241331>

Zhu, Y., Geis, C., So, E., & Jin, Y. (2021). Multitemporal Relearning with Convolutional LSTM Models for Land Use Classification. *IEEE Journal of Selected Topics in Applied Earth Observations and Remote Sensing*, 14, 3251–3265. <https://doi.org/10.1109/JSTARS.2021.3055784>
