# Supplementary figures and images for: A Review and Meta-analysis of Semantic Segmentation Models in Land Use/ Land Cover Mapping
Source: Preprints.org preprint supplement (doi:10.20944/preprints202405.0580.v1), 2024-05-09

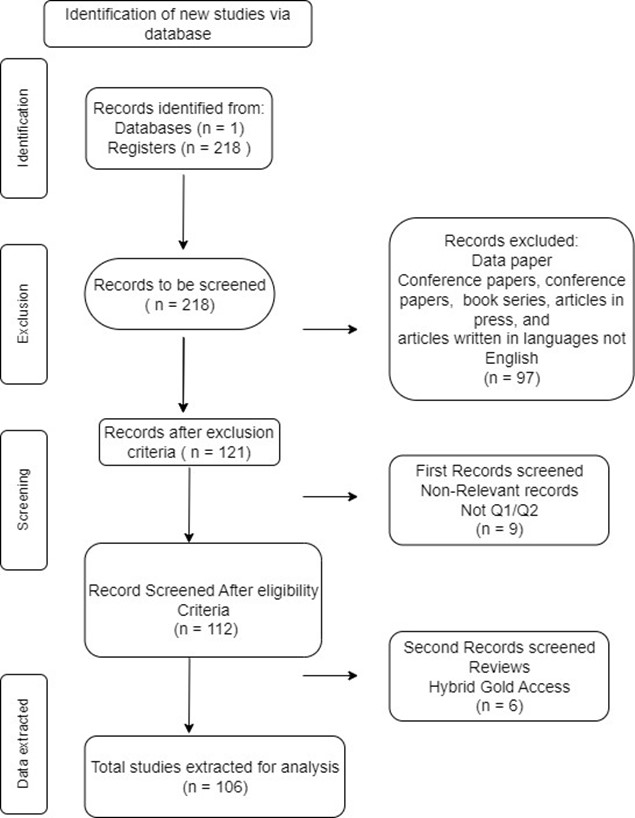

Supplement: Supplementary file 1 [file supplementary › Supplementary Files/Figure 1.jpg]

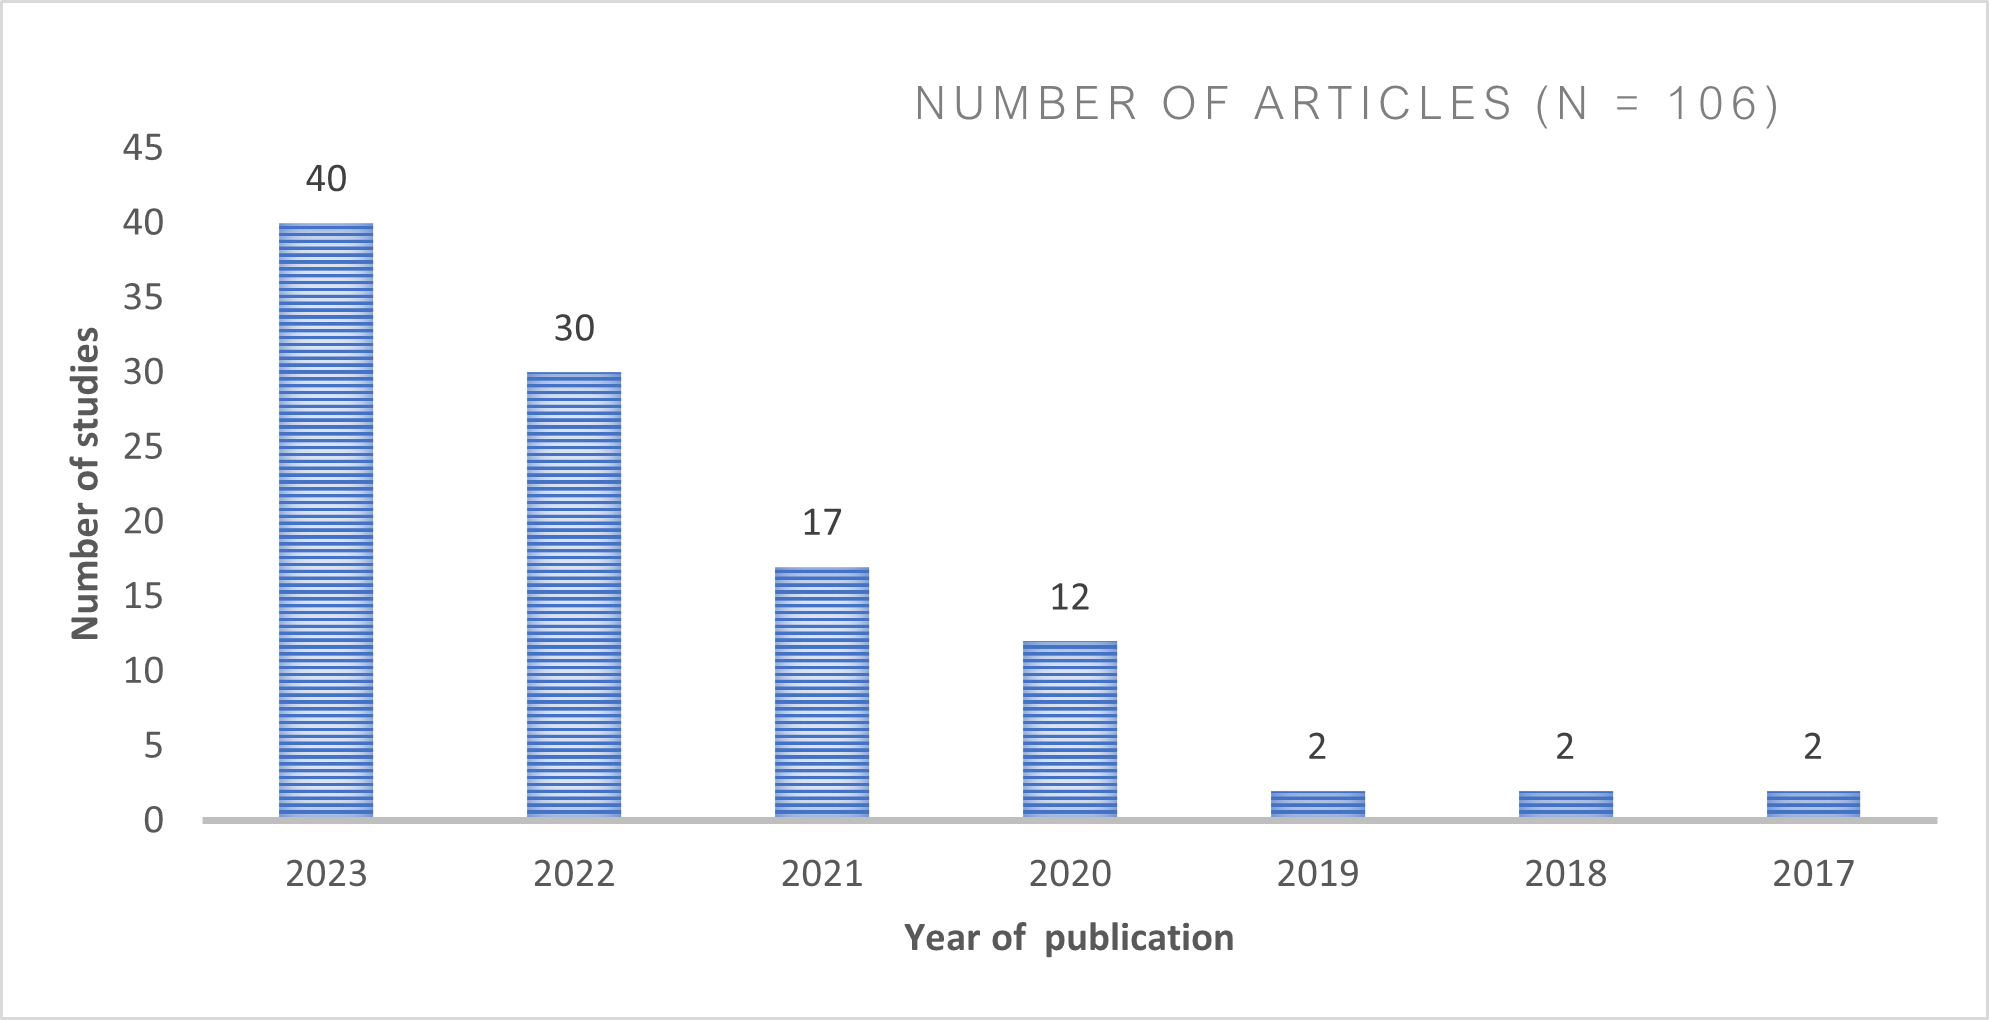

Supplement: Supplementary file 1 [file supplementary › Supplementary Files/Figure 2.png]

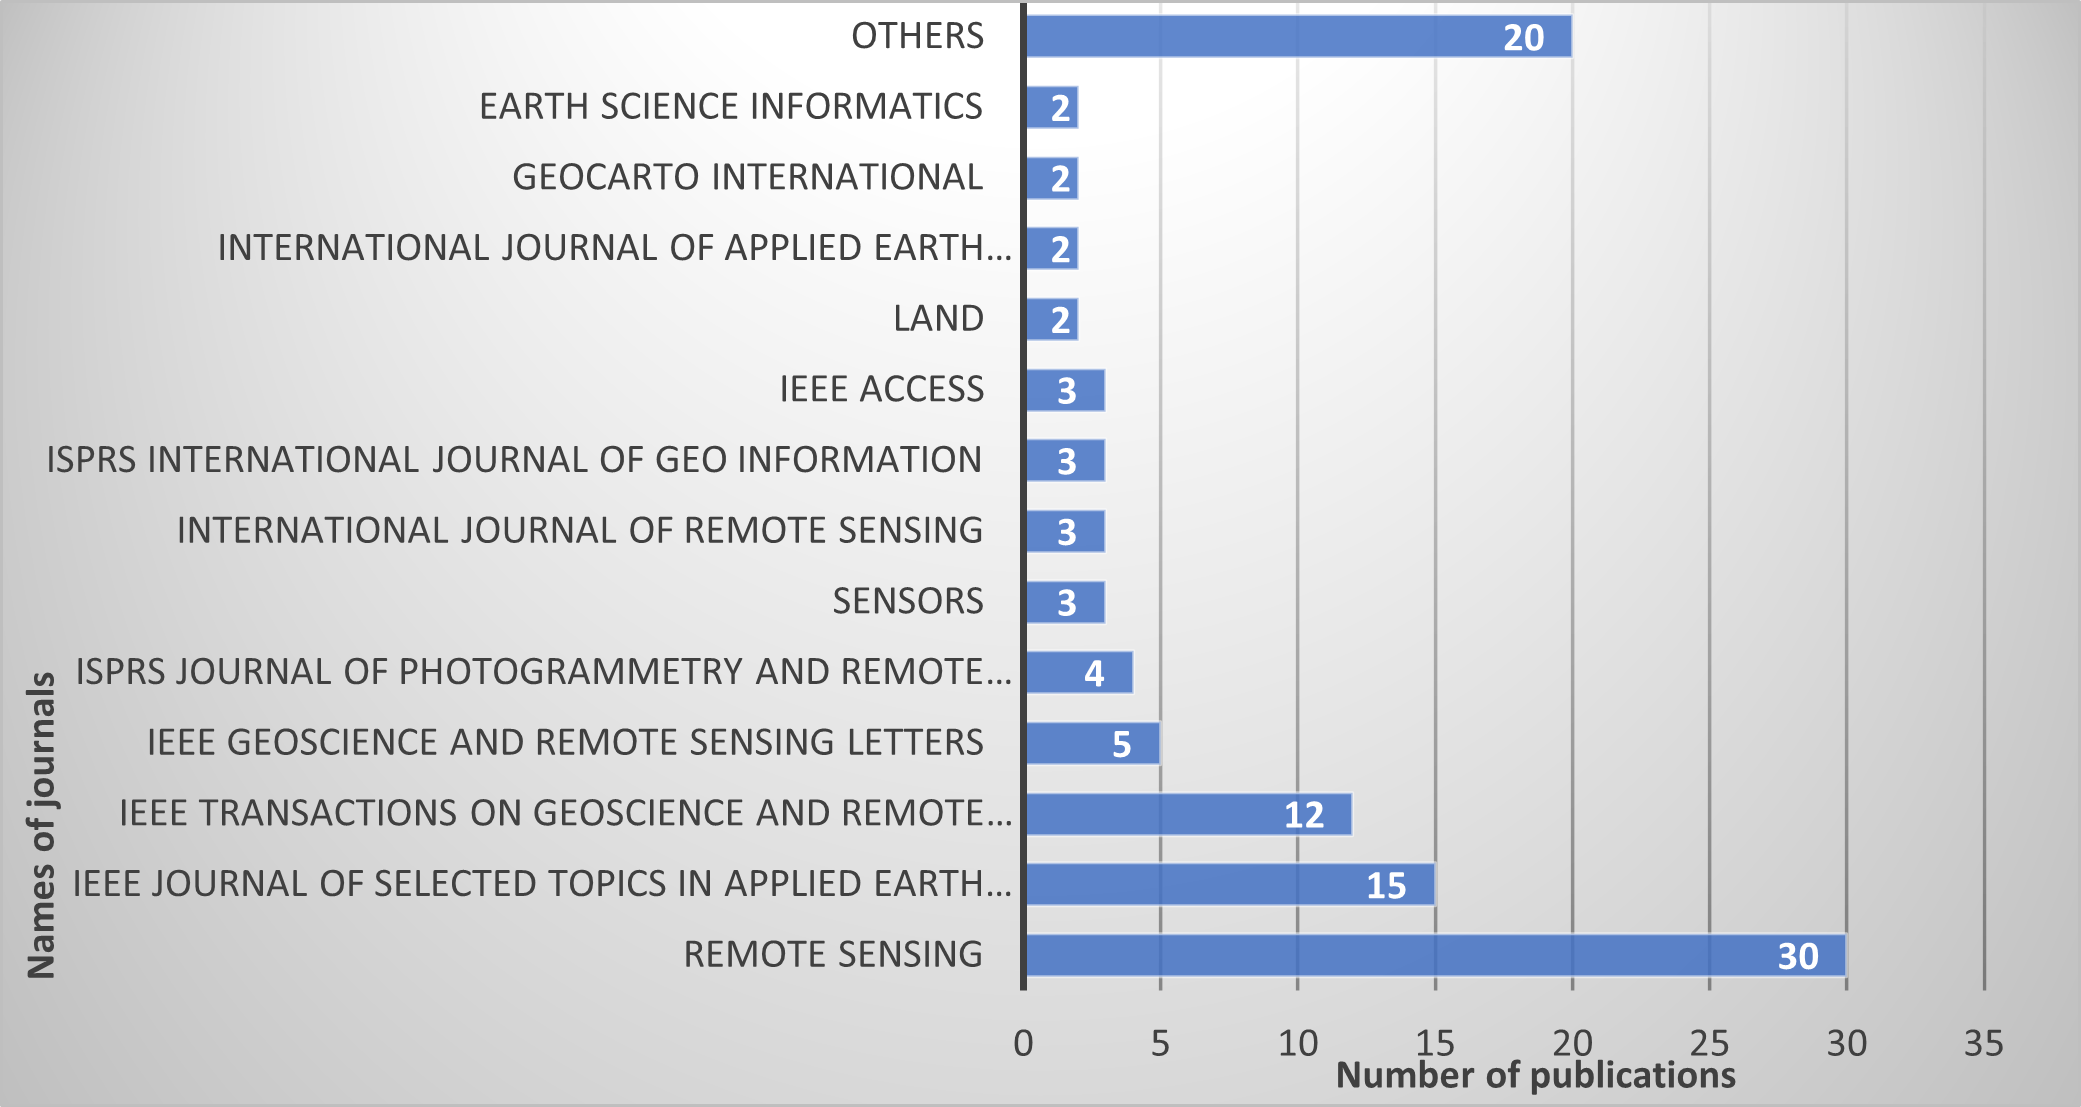

Supplement: Supplementary file 1 [file supplementary › Supplementary Files/Figure 3.png]

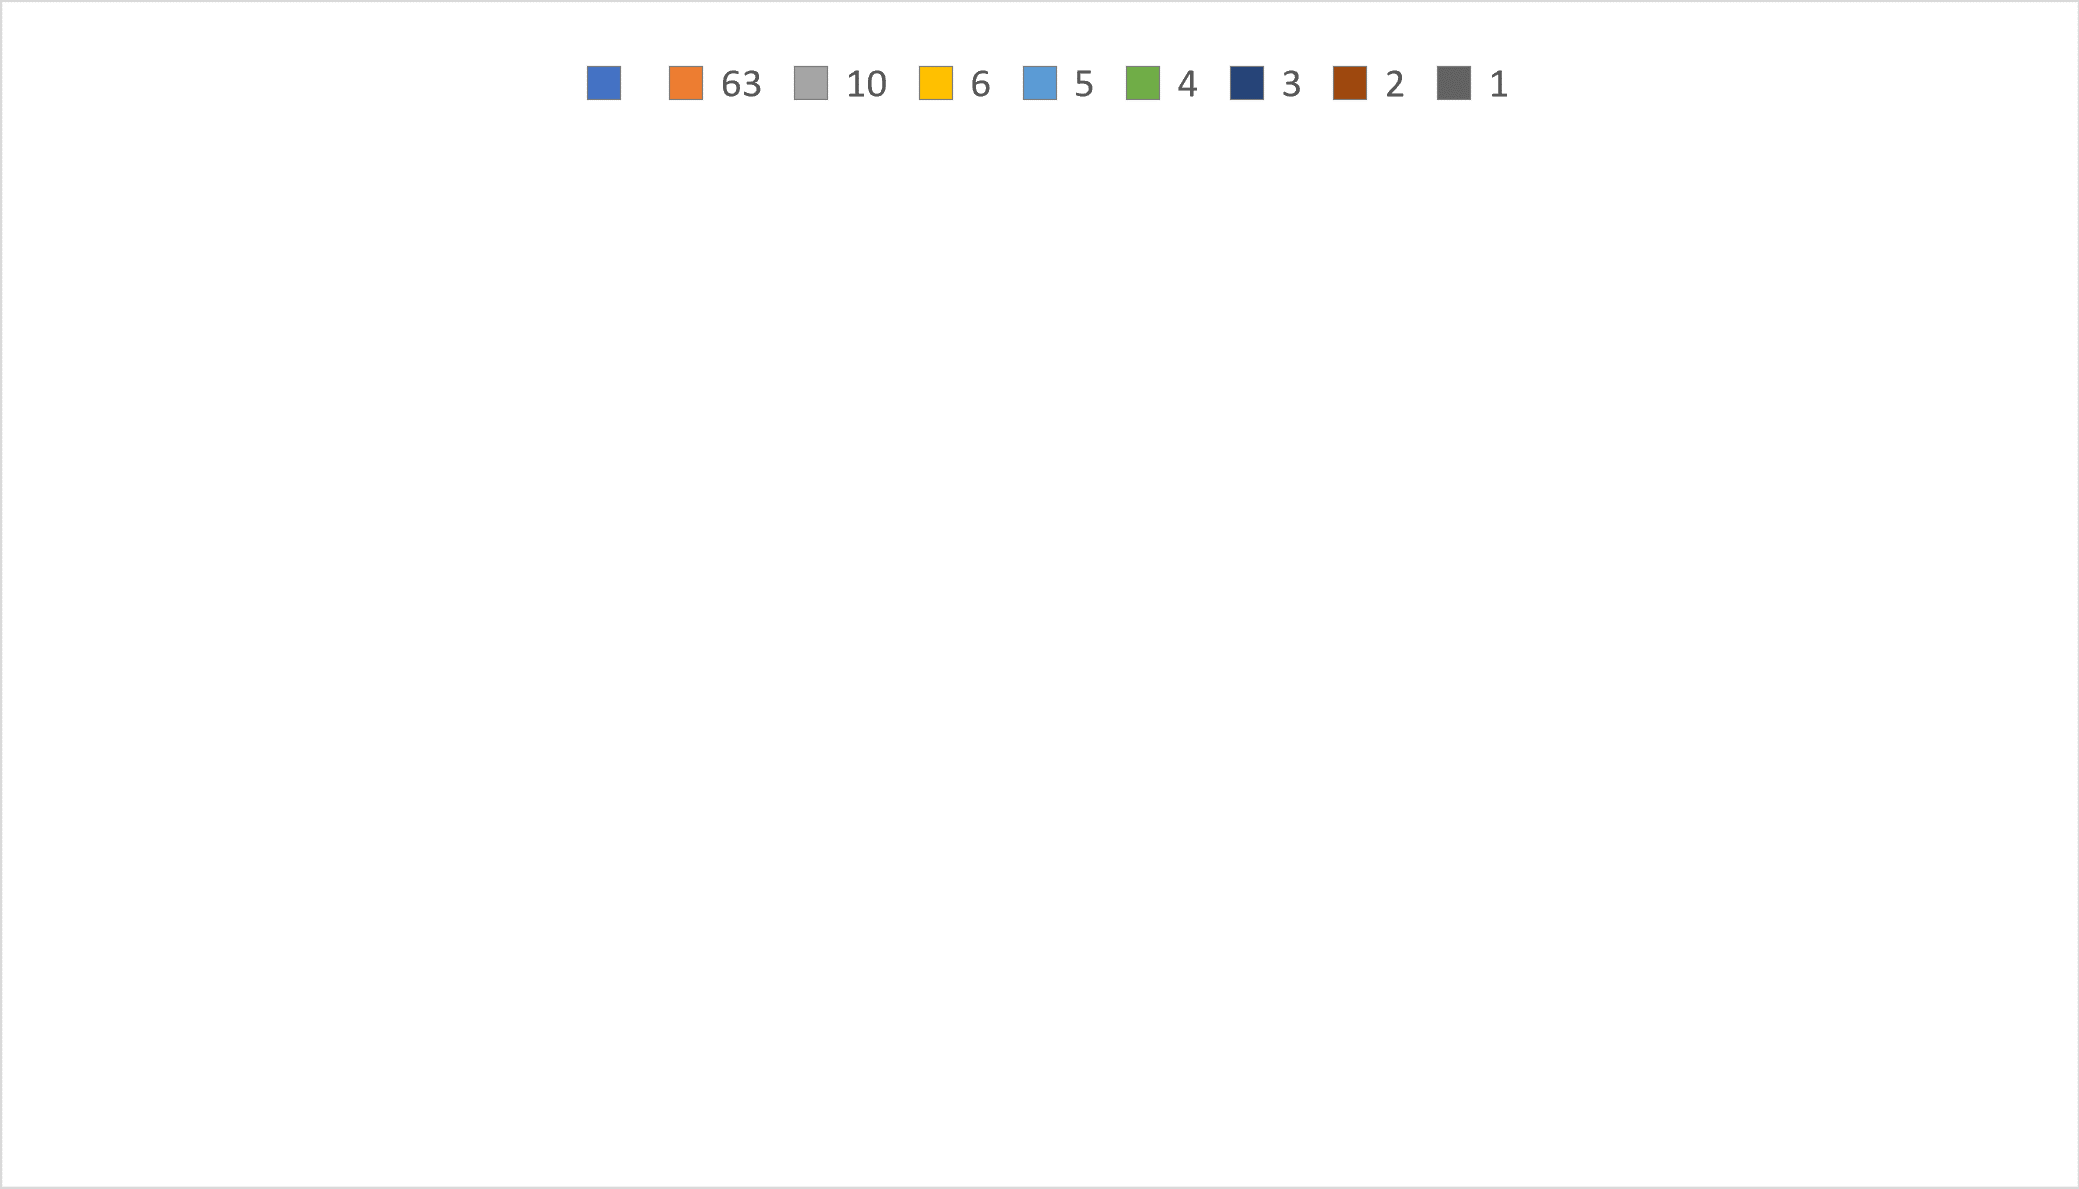

Supplement: Supplementary file 1 [file supplementary › Supplementary Files/Figure 4.png]

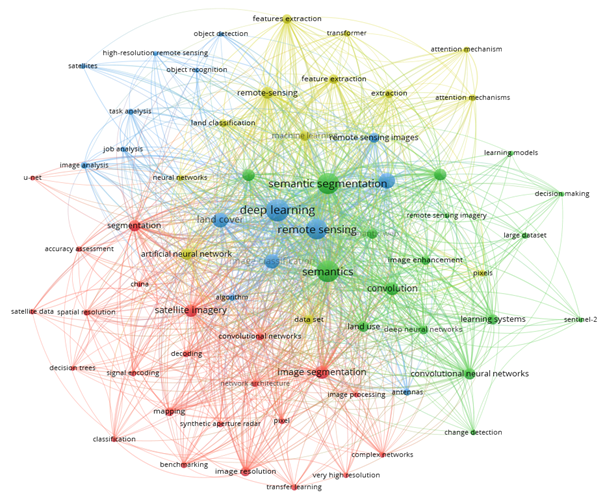

Supplement: Supplementary file 1 [file supplementary › Supplementary Files/Figure 5.png]

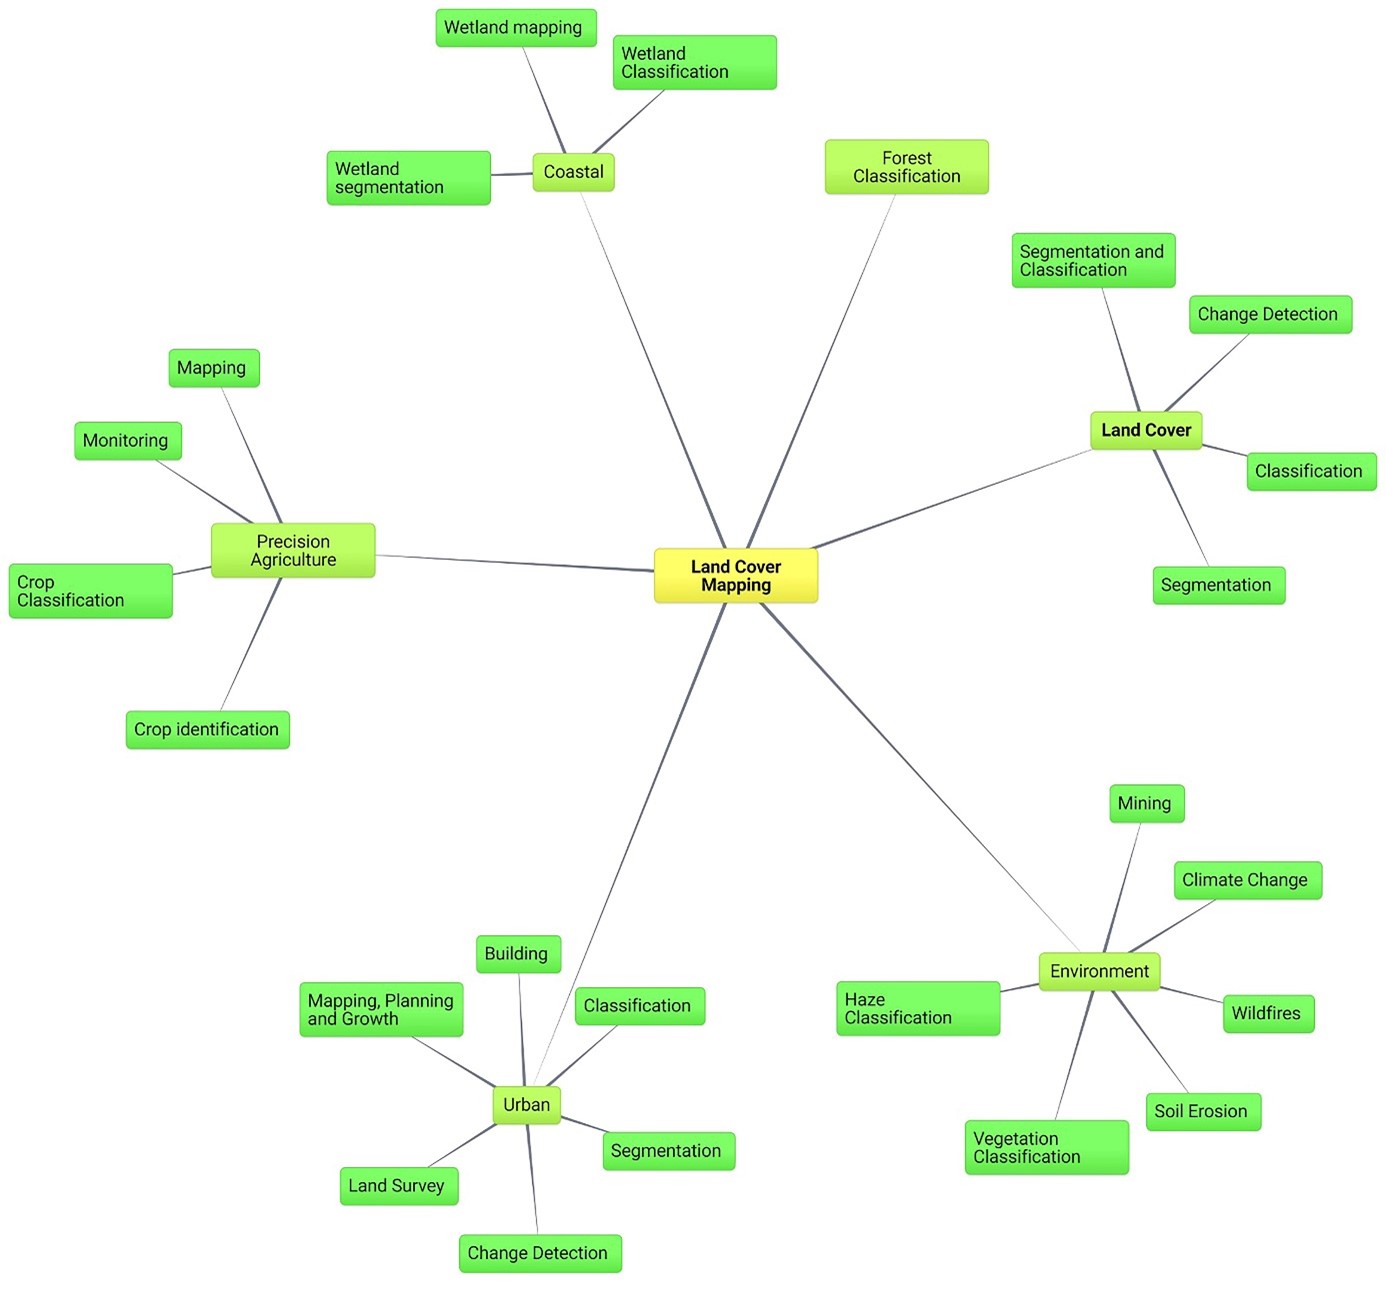

Supplement: Supplementary file 1 [file supplementary › Supplementary Files/Figure 6.jpg]

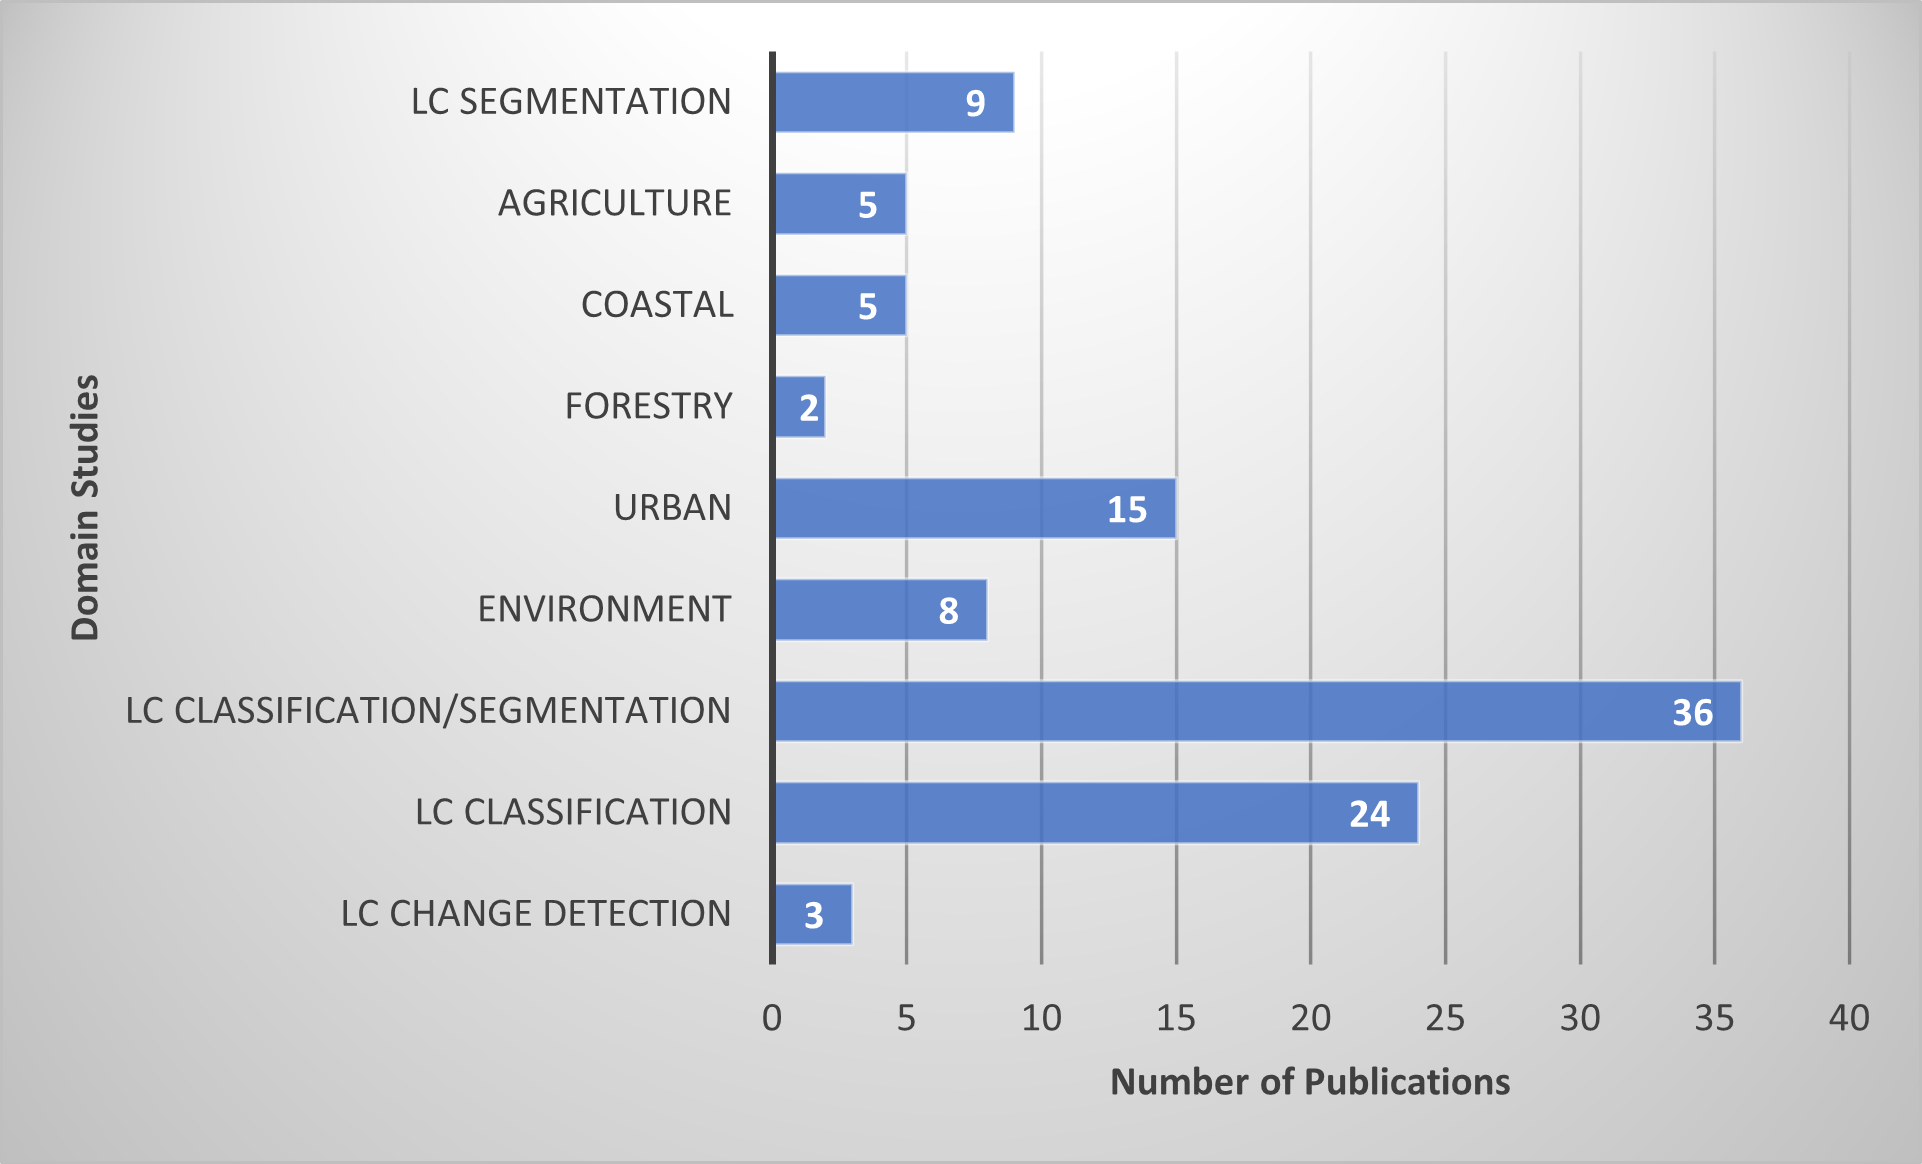

Supplement: Supplementary file 1 [file supplementary › Supplementary Files/Figure 7.png]

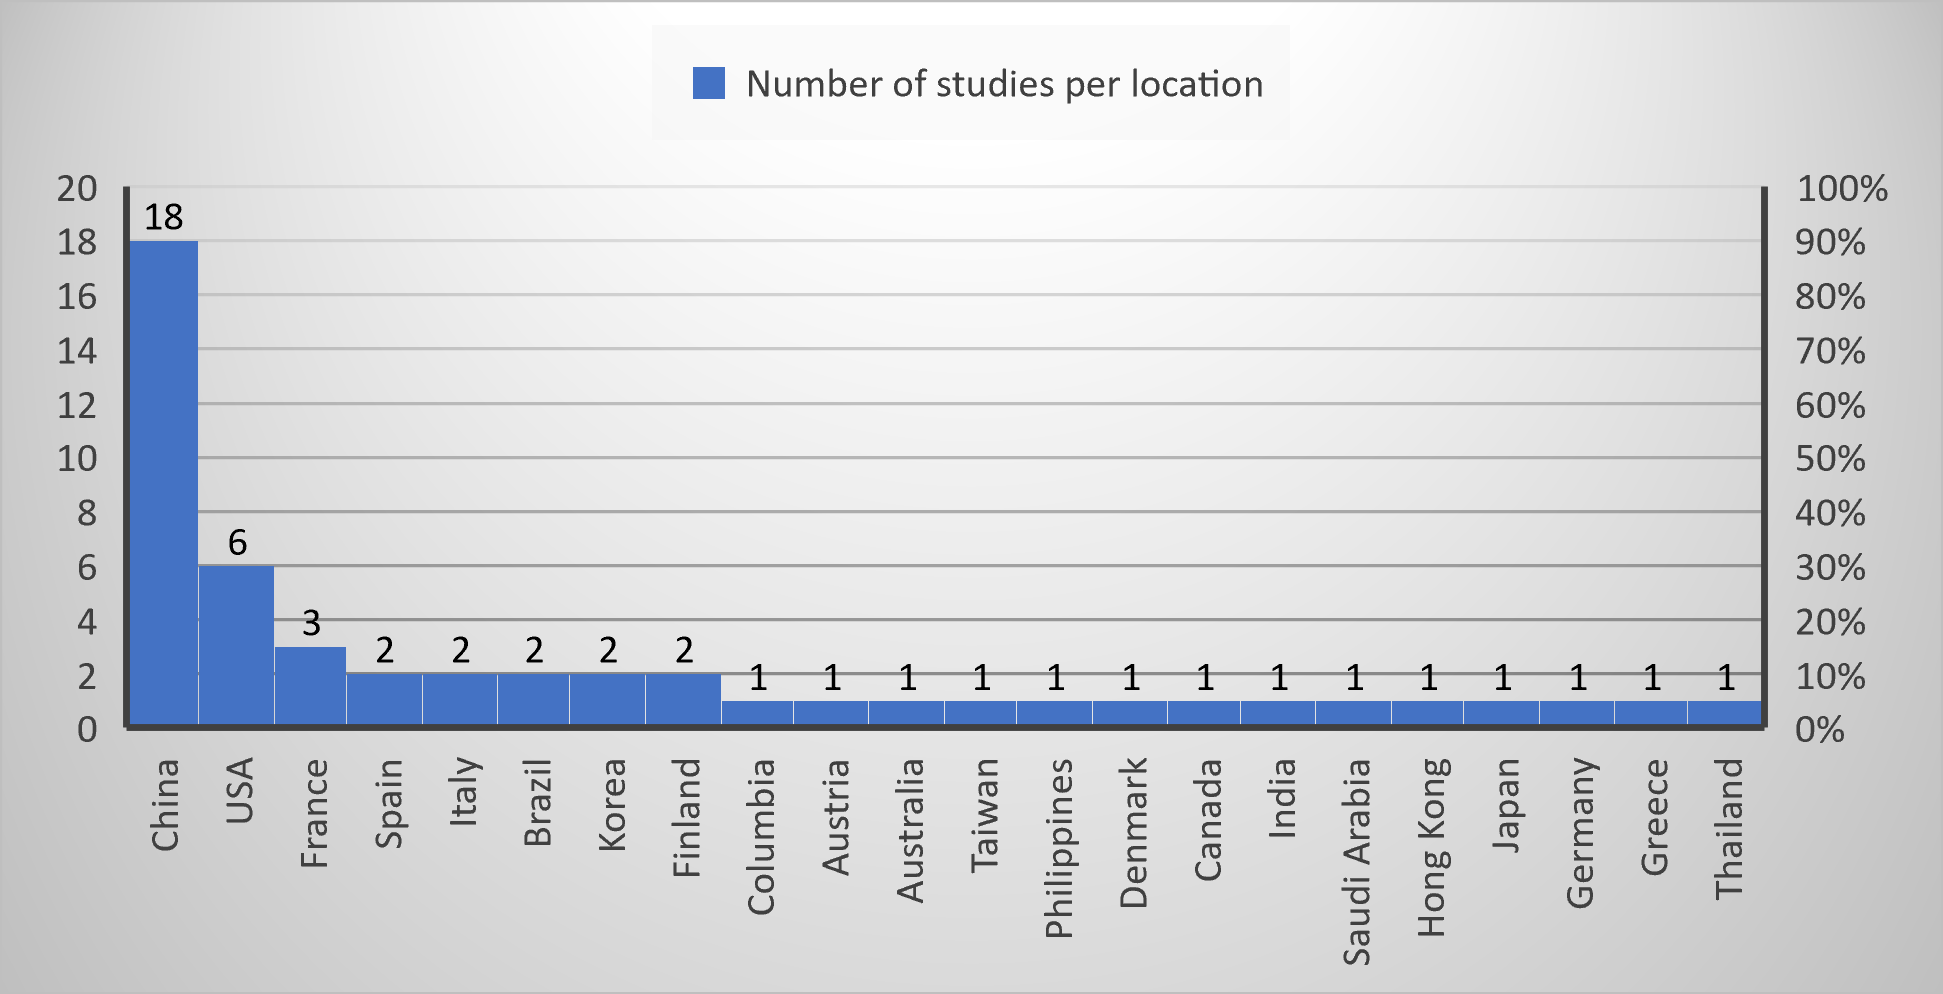

Supplement: Supplementary file 1 [file supplementary › Supplementary Files/Figure 8.png]

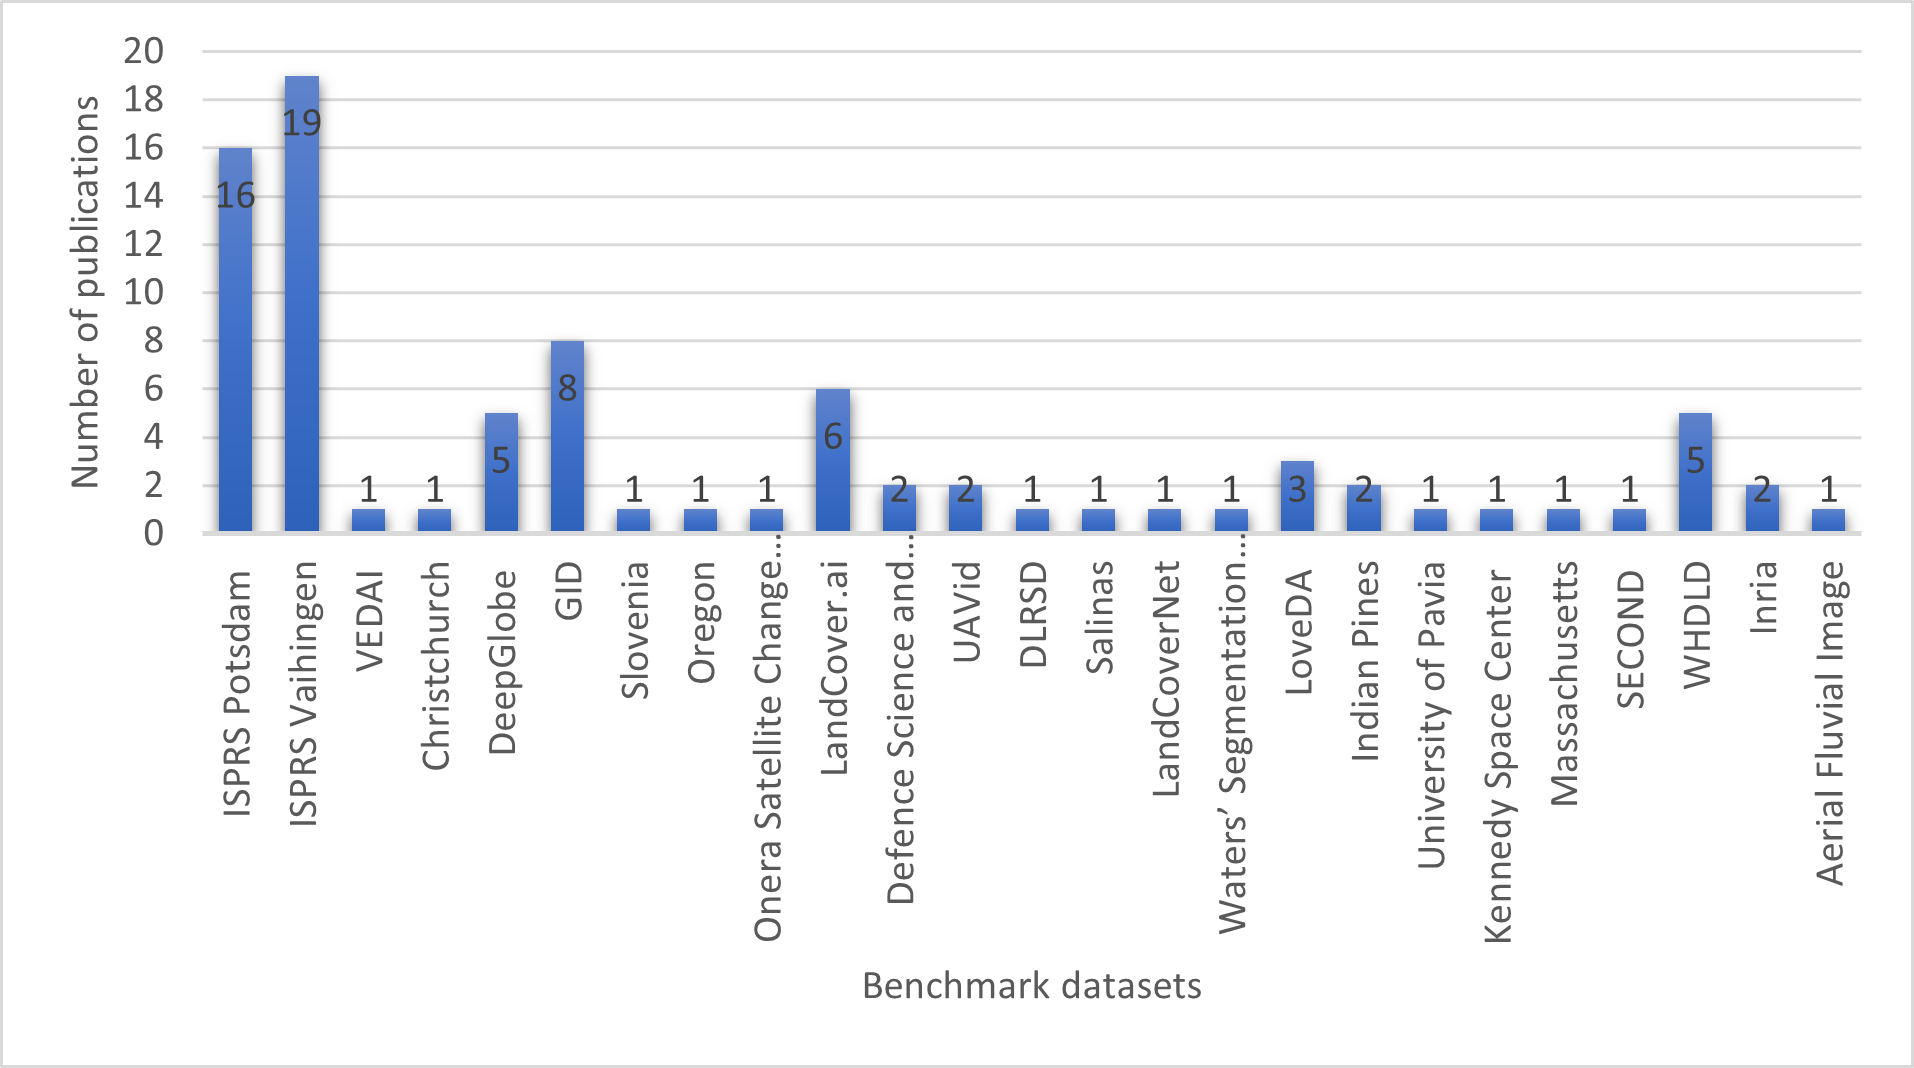

Supplement: Supplementary file 1 [file supplementary › Supplementary Files/Figure 9.png]
